# Supplementary material for: ERK5 Interacts with Mitochondrial Glutaminase and Regulates Its Expression
Source: MDPI journal article supplement (doi:10.3390/ijms25063273), 2024-03-14
Supplement: s1 [file s1]

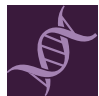

## *Supplementary Materials*

# **ERK5 Interacts with Mitochondrial Glutaminase and regulates its expression**

Yolanda María Guillén-Pérez, María Jesús Ortiz-Ruiz, Javier Márquez, Atanasio Pandiella and Azucena Esparís-Ogando

A

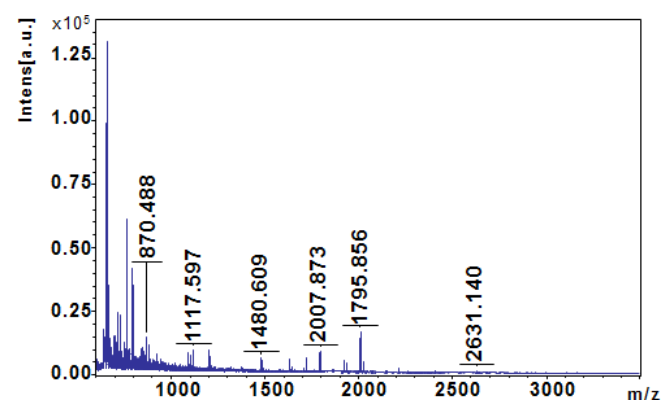

B

1. [sp|O94925-3|GLSK\\_HUMAN](#) Mass: 66216 Score: **168** Expect: 6.7e-013 Matches: 13  
Isoform 3 of Glutaminase kidney isoform, mitochondrial OS=Homo sapiens OX=9606 GN=GLS

| Observed  | Mr (expt) | Mr (calc) | ppm    | Start | End | Miss | Ions | Peptide                               |
|-----------|-----------|-----------|--------|-------|-----|------|------|---------------------------------------|
| 870.4881  | 869.4808  | 869.4971  | -18.66 | 447   | 454 | 0    |      | R.VLSPEAVR.N                          |
| 1088.5519 | 1087.5446 | 1087.5702 | -23.53 | 388   | 396 | 0    |      | R.NFAIGYYLK.E                         |
| 1105.5841 | 1104.5768 | 1104.5927 | -14.43 | 308   | 317 | 1    |      | R.YVGKEPSGLR.F                        |
| 1117.5967 | 1116.5894 | 1116.6179 | -25.53 | 246   | 255 | 0    |      | K.VADYIPQLAK.F                        |
| 1480.6094 | 1479.6021 | 1479.6114 | -6.28  | 107   | 121 | 0    |      | K.DGPGETDAFGNSEGK.E                   |
| 1632.8045 | 1631.7973 | 1631.7943 | 1.79   | 383   | 396 | 1    |      | R.ESGDRNFAIGYYLK.E                    |
| 1648.8794 | 1647.8721 | 1647.8767 | -2.77  | 203   | 216 | 0    |      | K.CVQSNIVLLTQAFR.R                    |
| 1720.8520 | 1719.8448 | 1719.8580 | -7.71  | 293   | 307 | 0    |      | K.YAIAVNDLTGEYVHR.Y                   |
| 1795.8557 | 1794.8484 | 1794.8636 | -8.45  | 575   | 590 | 0    |      | K.VSPESNEDISTTVVVR.M                  |
| 1922.9147 | 1921.9074 | 1921.8993 | 4.21   | 256   | 272 | 0    |      | K.FSPDLWGVSVCTVDGQR.H                 |
| 2007.8726 | 2006.8653 | 2006.8792 | -6.93  | 365   | 382 | 0    |      | K.MAGNEYVGFSNATFQSER.E                |
| 2023.8614 | 2022.8541 | 2022.8741 | -9.90  | 365   | 382 | 0    |      | K.MAGNEYVGFSNATFQSER.E+ Oxidation (M) |
| 2631.1399 | 2630.1326 | 2630.1907 | -22.08 | 514   | 534 | 0    |      | K.GIHFHCDLVSLCNFHNVDNLR.H             |

No match to: 1202.6034, 1936.9142

2. [sp|O94925|GLSK\\_HUMAN](#) Mass: 74269 Score: **141** Expect: 3.4e-010 Matches: 12  
Glutaminase kidney isoform, mitochondrial OS=Homo sapiens OX=9606 GN=GLS PE=1 SV=1

| Observed  | Mr (expt) | Mr (calc) | ppm    | Start | End | Miss | Ions | Peptide                               |
|-----------|-----------|-----------|--------|-------|-----|------|------|---------------------------------------|
| 870.4881  | 869.4808  | 869.4971  | -18.66 | 447   | 454 | 0    |      | R.VLSPEAVR.N                          |
| 1088.5519 | 1087.5446 | 1087.5702 | -23.53 | 388   | 396 | 0    |      | R.NFAIGYYLK.E                         |
| 1105.5841 | 1104.5768 | 1104.5927 | -14.43 | 308   | 317 | 1    |      | R.YVGKEPSGLR.F                        |
| 1117.5967 | 1116.5894 | 1116.6179 | -25.53 | 246   | 255 | 0    |      | K.VADYIPQLAK.F                        |
| 1480.6094 | 1479.6021 | 1479.6114 | -6.28  | 107   | 121 | 0    |      | K.DGPGETDAFGNSEGK.E                   |
| 1632.8045 | 1631.7973 | 1631.7943 | 1.79   | 383   | 396 | 1    |      | R.ESGDRNFAIGYYLK.E                    |
| 1648.8794 | 1647.8721 | 1647.8767 | -2.77  | 203   | 216 | 0    |      | K.CVQSNIVLLTQAFR.R                    |
| 1720.8520 | 1719.8448 | 1719.8580 | -7.71  | 293   | 307 | 0    |      | K.YAIAVNDLTGEYVHR.Y                   |
| 1922.9147 | 1921.9074 | 1921.8993 | 4.21   | 256   | 272 | 0    |      | K.FSPDLWGVSVCTVDGQR.H                 |
| 2007.8726 | 2006.8653 | 2006.8792 | -6.93  | 365   | 382 | 0    |      | K.MAGNEYVGFSNATFQSER.E                |
| 2023.8614 | 2022.8541 | 2022.8741 | -9.90  | 365   | 382 | 0    |      | K.MAGNEYVGFSNATFQSER.E+ Oxidation (M) |
| 2631.1399 | 2630.1326 | 2630.1907 | -22.08 | 514   | 534 | 0    |      | K.GIHFHCDLVSLCNFHNVDNLR.H             |

No match to: 1202.6034, 1795.8557, 1936.9142

C

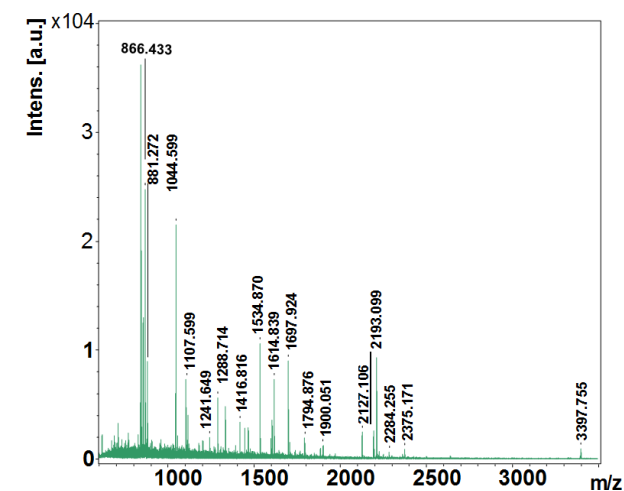

D

| Accession                                 | Mass  | Score | Description                                                                         |
|-------------------------------------------|-------|-------|-------------------------------------------------------------------------------------|
| 1. <a href="#">sp Q13164 MK07_HUMAN</a>   | 88787 | 178   | Mitogen-activated protein kinase 7<br>OS=Homo sapiens OX=9606 GN=MAPK7 PE=1 SV=2    |
| 2. <a href="#">sp Q13164-3 MK07_HUMAN</a> | 59690 | 158   | Isoform 3 of Mitogen-activated protein kinase 7<br>OS=Homo sapiens OX=9606 GN=MAPK7 |
| 3. <a href="#">sp Q13164-2 MK07_HUMAN</a> | 73628 | 131   | Isoform 2 of Mitogen-activated protein kinase 7<br>OS=Homo sapiens OX=9606 GN=MAPK7 |
| 4. <a href="#">sp Q13164-4 MK07_HUMAN</a> | 50690 | 93    | Isoform 4 of Mitogen-activated protein kinase 7<br>OS=Homo sapiens OX=9606 GN=MAPK7 |

**Supplementary Figure S1.** (A) MALDI-TOF mass spectrum of the trypsin-digested **red asterisk** band (peptide mass fingerprint with m/z value). (B) Mascot search results for protein identification by peptide mass fingerprint against Swiss Prot database. Comparison of observed and predicted tryptic peptides. (C) MALDI-TOF mass spectrum of the trypsin-digested **green asterisk** band (peptide mass fingerprint with m/z value). (D) Mascot search results for protein identification by peptide mass fingerprint against Swiss Prot database.

A

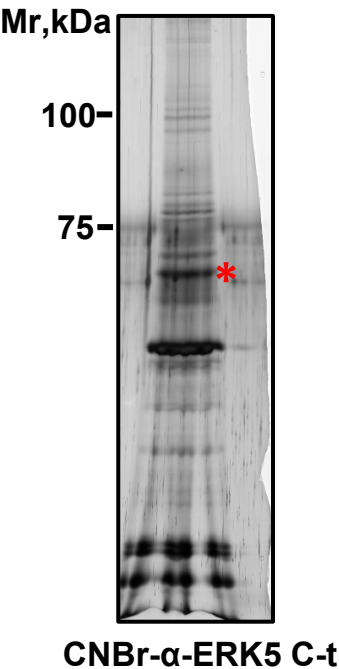

B

| Band | Accession number       | Mass (Da) | Score | Protein                                              |
|------|------------------------|-----------|-------|------------------------------------------------------|
| *    | sp 094925-3 GLSK HUMAN | 66216     | 225   | Isoform 3 of Glutaminase kidney, mitochondrial (GAC) |
| *    | sp 094925 GLSK HUMAN   | 74269     | 168   | Glutaminase kidney isoform, mitochondrial (KGA)      |

C

GAC (39 % Coverage)

|     |            |            |            |            |            |
|-----|------------|------------|------------|------------|------------|
| 1   | MMRLRGSGML | RDLLLRSPAG | VSATLRRAQP | LVTLCRRPRG | GGRPAAGPAA |
| 51  | AARLHPWWGG | GGWPAEPLAR | GLSSSPSEIL | QELGKGSTHP | QPGVSPPAAP |
| 101 | AAPGPKDGP  | ETDAFGNSEG | KELVASGENK | IKQGLLPSE  | DLLFYTIAEG |
| 151 | QEKIPVHKFI | TALKSTGLRT | SDPRLKECMD | MLRLTLQTTS | DGVMLDKDLF |
| 201 | KKCVQSNIVL | LTQAFRRKFV | IPDFMSFTSH | IDELYESA   | QSGGKVADYI |
| 251 | PQLAKFSPDL | WGVSVCTVDG | QRHSTGDTKV | PFCLQSCVKP | LKYAIAVNDL |
| 301 | GTEYVHRYVG | KEPSGLRFNK | LFLNEDDKPH | NPMVNAGAI  | VTSLIKQGVN |
| 351 | NAEKFDYVMQ | FLNKMAGNEY | VGFSNATFQS | ERESGDRNFA | IGYYLKEKCC |
| 401 | FPEGTDMMGI | LDYFQLCSI  | EVTCEASVM  | AATLANGGFC | PITGERVLSP |
| 451 | EAVRNTLSLM | HSCGMYDFSG | QFAFHVGLPA | KSGVAGGILL | VVPNVMMMC  |
| 501 | WSPPLDKMGN | SVKGIHFCHD | LVSLCNFHNY | DNLRHFAKKL | DPRREGGDQR |
| 551 | HSFGPLDYES | LQELALKET  | VWKKVSPESN | EDISTTVVYR | MESLGEKS   |

D

KGA (29 % Coverage)

|     |             |            |            |            |            |
|-----|-------------|------------|------------|------------|------------|
| 1   | MMRLRGSGML  | RDLLLRSPAG | VSATLRRAQP | LVTLCRRPRG | GGRPAAGPAA |
| 51  | AARLHPWWGG  | GGWPAEPLAR | GLSSSPSEIL | QELGKGSTHP | QPGVSPPAAP |
| 101 | AAPGPKDGP   | ETDAFGNSEG | KELVASGENK | IKQGLLPSE  | DLLFYTIAEG |
| 151 | QEKIPVHKFI  | TALKSTGLRT | SDPRLKECMD | MLRLTLQTTS | DGVMLDKDLF |
| 201 | KKCVQSNIVL  | LTQAFRRKFV | IPDFMSFTSH | IDELYESA   | QSGGKVADYI |
| 251 | PQLAKFSPDL  | WGVSVCTVDG | QRHSTGDTKV | PFCLQSCVKP | LKYAIAVNDL |
| 301 | GTEYVHRYVG  | KEPSGLRFNK | LFLNEDDKPH | NPMVNAGAI  | VTSLIKQGVN |
| 351 | NAEKFDYVMQ  | FLNKMAGNEY | VGFSNATFQS | ERESGDRNFA | IGYYLKEKCC |
| 401 | FPEGTDMMGI  | LDYFQLCSI  | EVTCEASVM  | AATLANGGFC | PITGERVLSP |
| 451 | EAVRNTLSLM  | HSCGMYDFSG | QFAFHVGLPA | KSGVAGGILL | VVPNVMMMC  |
| 501 | WSPPLDKMGN  | SVKGIHFCHD | LVSLCNFHNY | DNLRHFAKKL | DPRREGGDQR |
| 551 | VKSVINLLFA  | AYTGDVSALR | RFALSAMDME | QRDYDSRTAL | HVAAAEGHVE |
| 601 | VVKFLLLEACK | VNPFPKDRWN | NTPMDEALHF | GHHDVFKILQ | EYQVQYTPQG |
| 651 | DSDNGKENQT  | VHKNDGLL   |            |            |            |

**Supplementary Figure S2. Proteomic studies. Affinity chromatography.** (A) Whole cell extracts from NP9 cells were subjected to affinity immunochromatography. Proteins eluted from the affinity column were resolved on SDS-PAGE and protein bands were visualized by silver staining. The band highlighted with a red asterisk was cut out and analyzed by MALDI-TOF MS. (B) Data obtained by mass spectrometry were analyzed using the Mascot search engine against the Swiss-Prot database. Individual scores higher than 59 were considered significant ( $p < 0.05$ ). (C-D) Matching peptides in the GAC and KGA sequences are highlighted in red and % coverage is indicated.

A

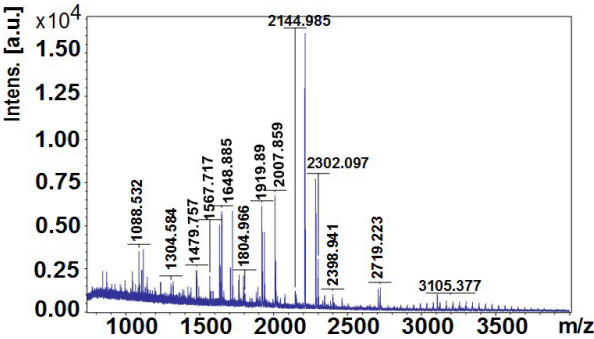

B

1. [sp|O94925-3|GLSK\\_HUMAN](#) Mass: 66216 Score: **225** Expect: 1.3e-018 Matches: 20  
Isoform 3 of Glutaminase kidney isoform, mitochondrial OS=Homo sapiens OX=9606 GN=GLS

| Observed  | Mr(expt)  | Mr(calc)  | ppm    | Start | End | Miss | Ions | Peptide                      |
|-----------|-----------|-----------|--------|-------|-----|------|------|------------------------------|
| 1088.5316 | 1087.5243 | 1087.5702 | -42.19 | 388   | 396 | 0    | ---  | R.NFAIGYYLK.E                |
| 1105.5586 | 1104.5513 | 1104.5927 | -37.50 | 308   | 317 | 1    | ---  | R.YVGKEPSGLR.F               |
| 1117.5779 | 1116.5706 | 1116.6179 | -42.33 | 246   | 255 | 0    | ---  | K.VADYIPQLAK.F               |
| 1304.5841 | 1303.5768 | 1303.6271 | -38.56 | 355   | 364 | 0    | ---  | K.FDYVMQFLNK.M               |
| 1575.7985 | 1574.7912 | 1574.8313 | -25.45 | 280   | 292 | 0    | ---  | K.VPFCQLQSCVKPLK.Y           |
| 1632.7829 | 1631.7756 | 1631.7943 | -11.47 | 383   | 396 | 1    | ---  | R.ESGDRNFAIGYYLK.E           |
| 1648.8546 | 1647.8473 | 1647.8767 | -17.80 | 203   | 216 | 0    | ---  | K.CVQSNIVLLTQAFR.R           |
| 1720.8507 | 1719.8434 | 1719.8580 | -8.49  | 293   | 307 | 0    | ---  | K.YAIAVNDLGTETVHR.Y          |
| 1795.8632 | 1794.8559 | 1794.8636 | -4.26  | 575   | 590 | 0    | ---  | K.VSPESNEDISTTVVYR.M         |
| 1804.9655 | 1803.9582 | 1803.9778 | -10.83 | 203   | 217 | 1    | ---  | K.CVQSNIVLLTQAFRR.K          |
| 1920.9215 | 1919.9142 | 1919.9854 | -37.05 | 86    | 106 | 0    | ---  | K.GSTHPQPGVSPPAAPAGPK.D      |
| 1922.8947 | 1921.8874 | 1921.8993 | -6.18  | 256   | 272 | 0    | ---  | K.FSPDLWGVSVCTVDGQR.H        |
| 1923.9209 | 1922.9136 | 1922.9585 | -23.35 | 574   | 590 | 1    | ---  | K.KVSPESNEDISTTVVYR.M        |
| 2007.8592 | 2006.8519 | 2006.8792 | -13.60 | 365   | 382 | 0    | ---  | K.MAGNEYVGFSNATFQSER.E       |
| 2024.9591 | 2023.9518 | 2024.0500 | -48.51 | 184   | 201 | 1    | ---  | R.LTLQTTSDGVMLDKDLFK.K       |
| 2074.9705 | 2073.9632 | 2074.0371 | -35.62 | 551   | 568 | 0    | ---  | R.HSFGPLDYESLQQLALK.E        |
| 2144.9847 | 2143.9774 | 2144.0361 | -27.35 | 347   | 364 | 1    | ---  | K.QGVNNAEKFDYVMQFLNK.M       |
| 2302.0969 | 2301.0896 | 2301.1610 | -31.01 | 273   | 292 | 1    | ---  | R.HSTGDTKVPFCLQSCVKPLK.Y     |
| 2408.0974 | 2407.0901 | 2407.0775 | 5.23   | 107   | 130 | 1    | ---  | K.DGPGETDAFGNSEGKELVASGENK.I |
| 2649.2184 | 2648.2111 | 2648.2290 | -6.74  | 256   | 279 | 1    | ---  | K.FSPDLWGVSVCTVDGQRHSTGDTK.V |

No match to: 1131.7571, 1479.7565, 1567.7170, 1763.7793, 1891.8845, 1936.8856, 2013.0567, 2155.1226, 2330.0893, 2384.9964, 2398.9411, 2401.9405, 2461.0789, 2705.0749, 2719.2274

2. [sp|O94925|GLSK\\_HUMAN](#) Mass: 74269 Score: **168** Expect: 6.7e-010 Matches: 17  
Glutaminase kidney isoform, mitochondrial OS=Homo sapiens OX=9606 GN=GLS PE=1 SV=1

| Observed  | Mr(expt)  | Mr(calc)  | ppm    | Start      | End        | Miss | Ions | Peptide                      |
|-----------|-----------|-----------|--------|------------|------------|------|------|------------------------------|
| 1088.5316 | 1087.5243 | 1087.5702 | -42.19 | <b>388</b> | <b>396</b> | 0    | ---  | R.NFAIGYYLK.E                |
| 1105.5586 | 1104.5513 | 1104.5927 | -37.50 | 308        | 317        | 1    | ---  | R.YVGKEPSGLR.F               |
| 1117.5779 | 1116.5706 | 1116.6179 | -42.33 | 246        | 255        | 0    | ---  | K.VADYIPQLAK.F               |
| 1304.5841 | 1303.5768 | 1303.6271 | -38.56 | 355        | 364        | 0    | ---  | K.FDYVMQFLNK.M               |
| 1575.7985 | 1574.7912 | 1574.8313 | -25.45 | 280        | 292        | 0    | ---  | K.VPFCQLQSCVKPLK.Y           |
| 1632.7829 | 1631.7756 | 1631.7943 | -11.47 | 383        | 396        | 1    | ---  | R.ESGDRNFAIGYYLK.E           |
| 1648.8546 | 1647.8473 | 1647.8767 | -17.80 | 203        | 216        | 0    | ---  | K.CVQSNIVLLTQAFR.R           |
| 1720.8507 | 1719.8434 | 1719.8580 | -8.49  | 293        | 307        | 0    | ---  | K.YAIAVNDLGTETVHR.Y          |
| 1804.9655 | 1803.9582 | 1803.9778 | -10.83 | 203        | 217        | 1    | ---  | K.CVQSNIVLLTQAFRR.K          |
| 1920.9215 | 1919.9142 | 1919.9854 | -37.05 | 86         | 106        | 0    | ---  | K.GSTHPQPGVSPPAAPAGPK.D      |
| 1922.8947 | 1921.8874 | 1921.8993 | -6.18  | 256        | 272        | 0    | ---  | K.FSPDLWGVSVCTVDGQR.H        |
| 2007.8592 | 2006.8519 | 2006.8792 | -13.60 | 365        | 382        | 0    | ---  | K.MAGNEYVGFSNATFQSER.E       |
| 2024.9591 | 2023.9518 | 2024.0500 | -48.51 | 184        | 201        | 1    | ---  | R.LTLQTTSDGVMLDKDLFK.K       |
| 2144.9847 | 2143.9774 | 2144.0361 | -27.35 | 347        | 364        | 1    | ---  | K.QGVNNAEKFDYVMQFLNK.M       |
| 2302.0969 | 2301.0896 | 2301.1610 | -31.01 | 273        | 292        | 1    | ---  | R.HSTGDTKVPFCLQSCVKPLK.Y     |
| 2408.0974 | 2407.0901 | 2407.0775 | 5.23   | 107        | 130        | 1    | ---  | K.DGPGETDAFGNSEGKELVASGENK.I |
| 2649.2184 | 2648.2111 | 2648.2290 | -6.74  | 256        | 279        | 1    | ---  | K.FSPDLWGVSVCTVDGQRHSTGDTK.V |

No match to: 1131.7571, 1479.7565, 1567.7170, 1763.7793, 1795.8632, 1891.8845, 1923.9209, 1936.8856, 2013.0567, 2074.9705, 2155.1226, 2330.0893, 2384.9964, 2398.9411, 2401.9405, 2461.0789, 2705.0749, 2719.2274

**Supplementary Figure S3.** (A) MALDI-TOF mass spectrum of the trypsin-digested **red asterisk** band (peptide mass fingerprint with m/z value). (B) Mascot search results for protein identification by peptide mass fingerprint against Swiss Prot database. Comparison of observed and predicted tryptic peptides.



**MITOTRACKER**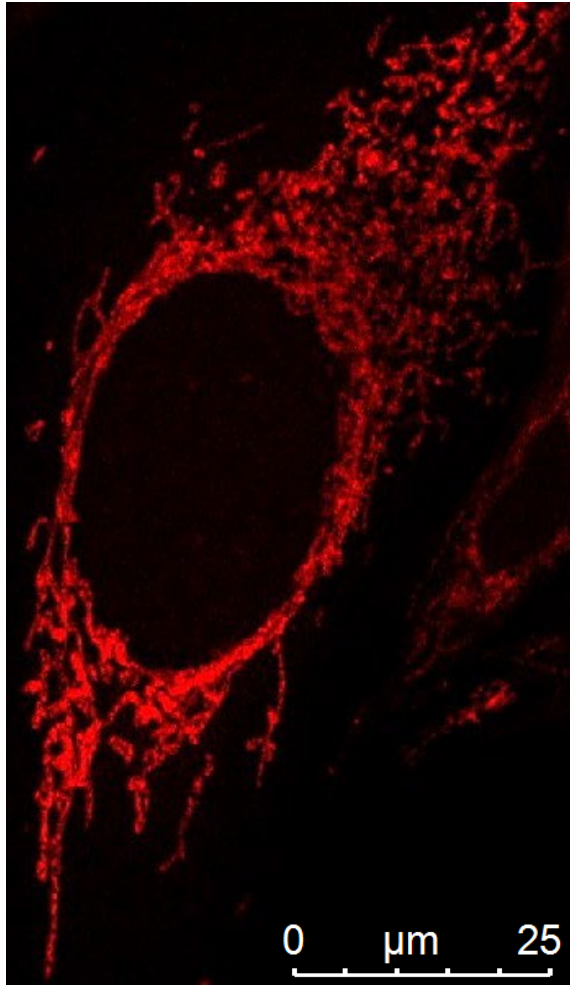**ANTI-ERK5**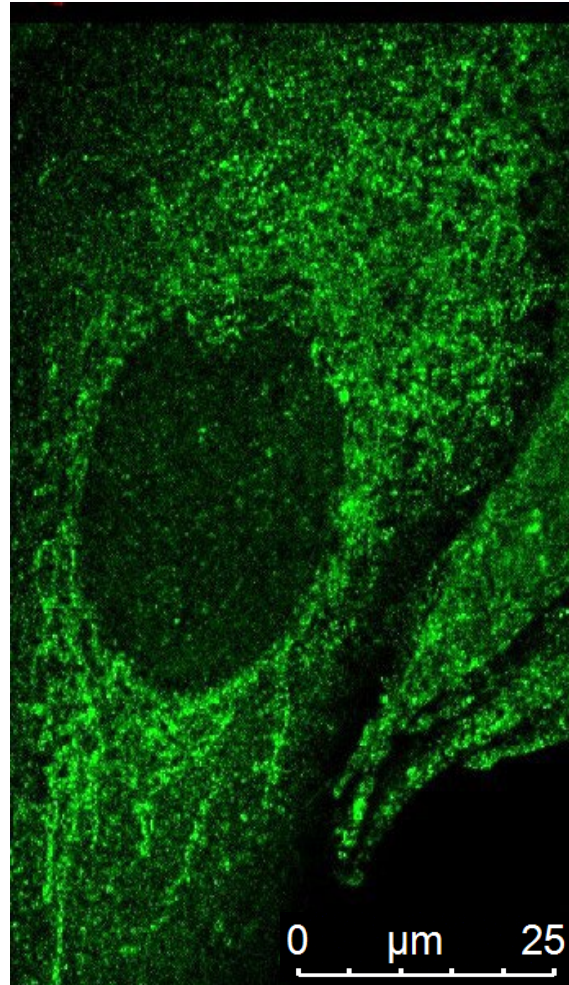**DAPI**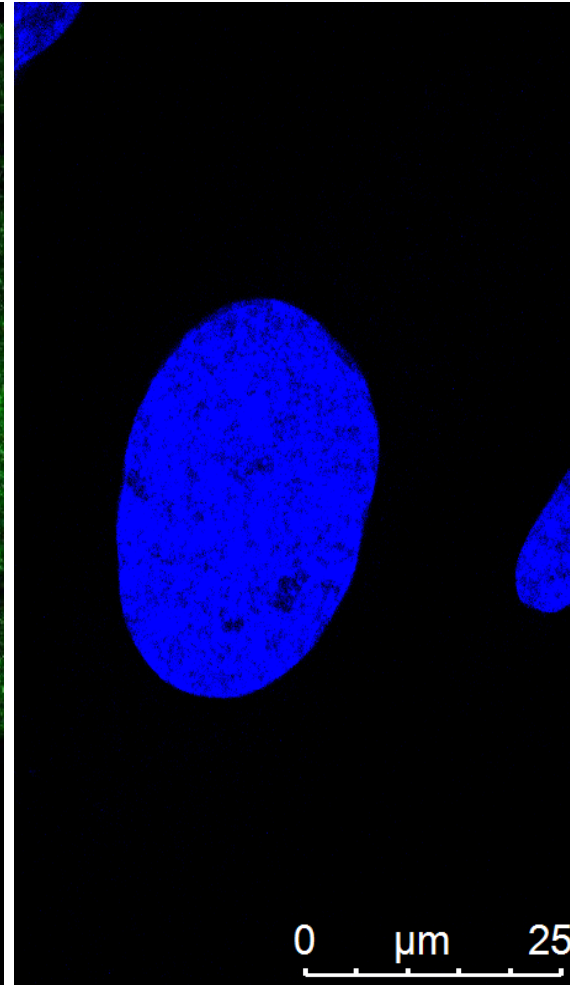**MERGE**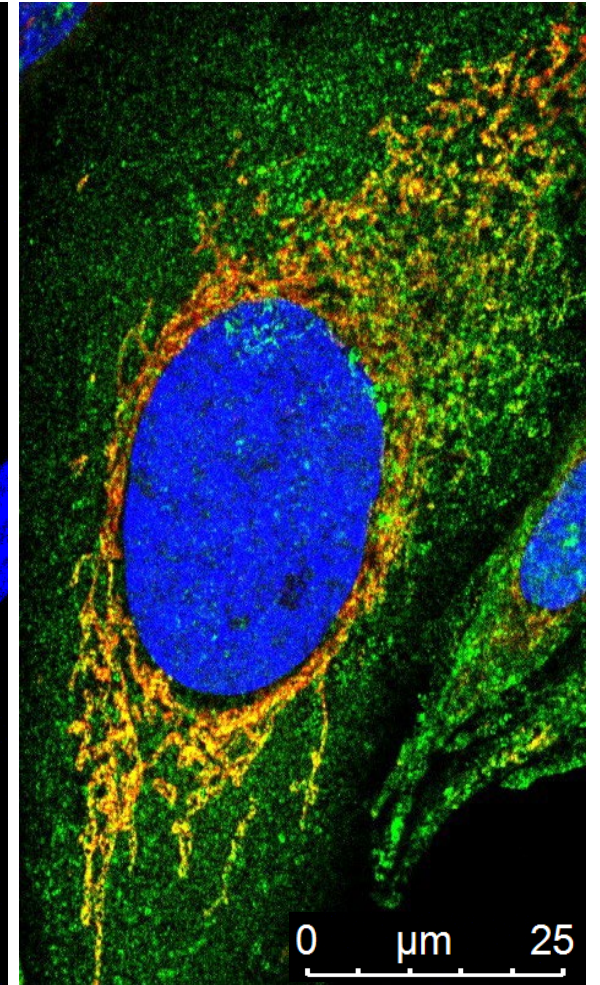

**Supplementary Figure S4. Mitochondrial network and ERK5 staining in NP9 cells.** Confocal microscopy images showing MitoTracker red staining, anti-ERK5, DAPI and a merged image of all three stains. The yellow signal in the merged image corresponds to coincident mitochondria and ERK5 staining.

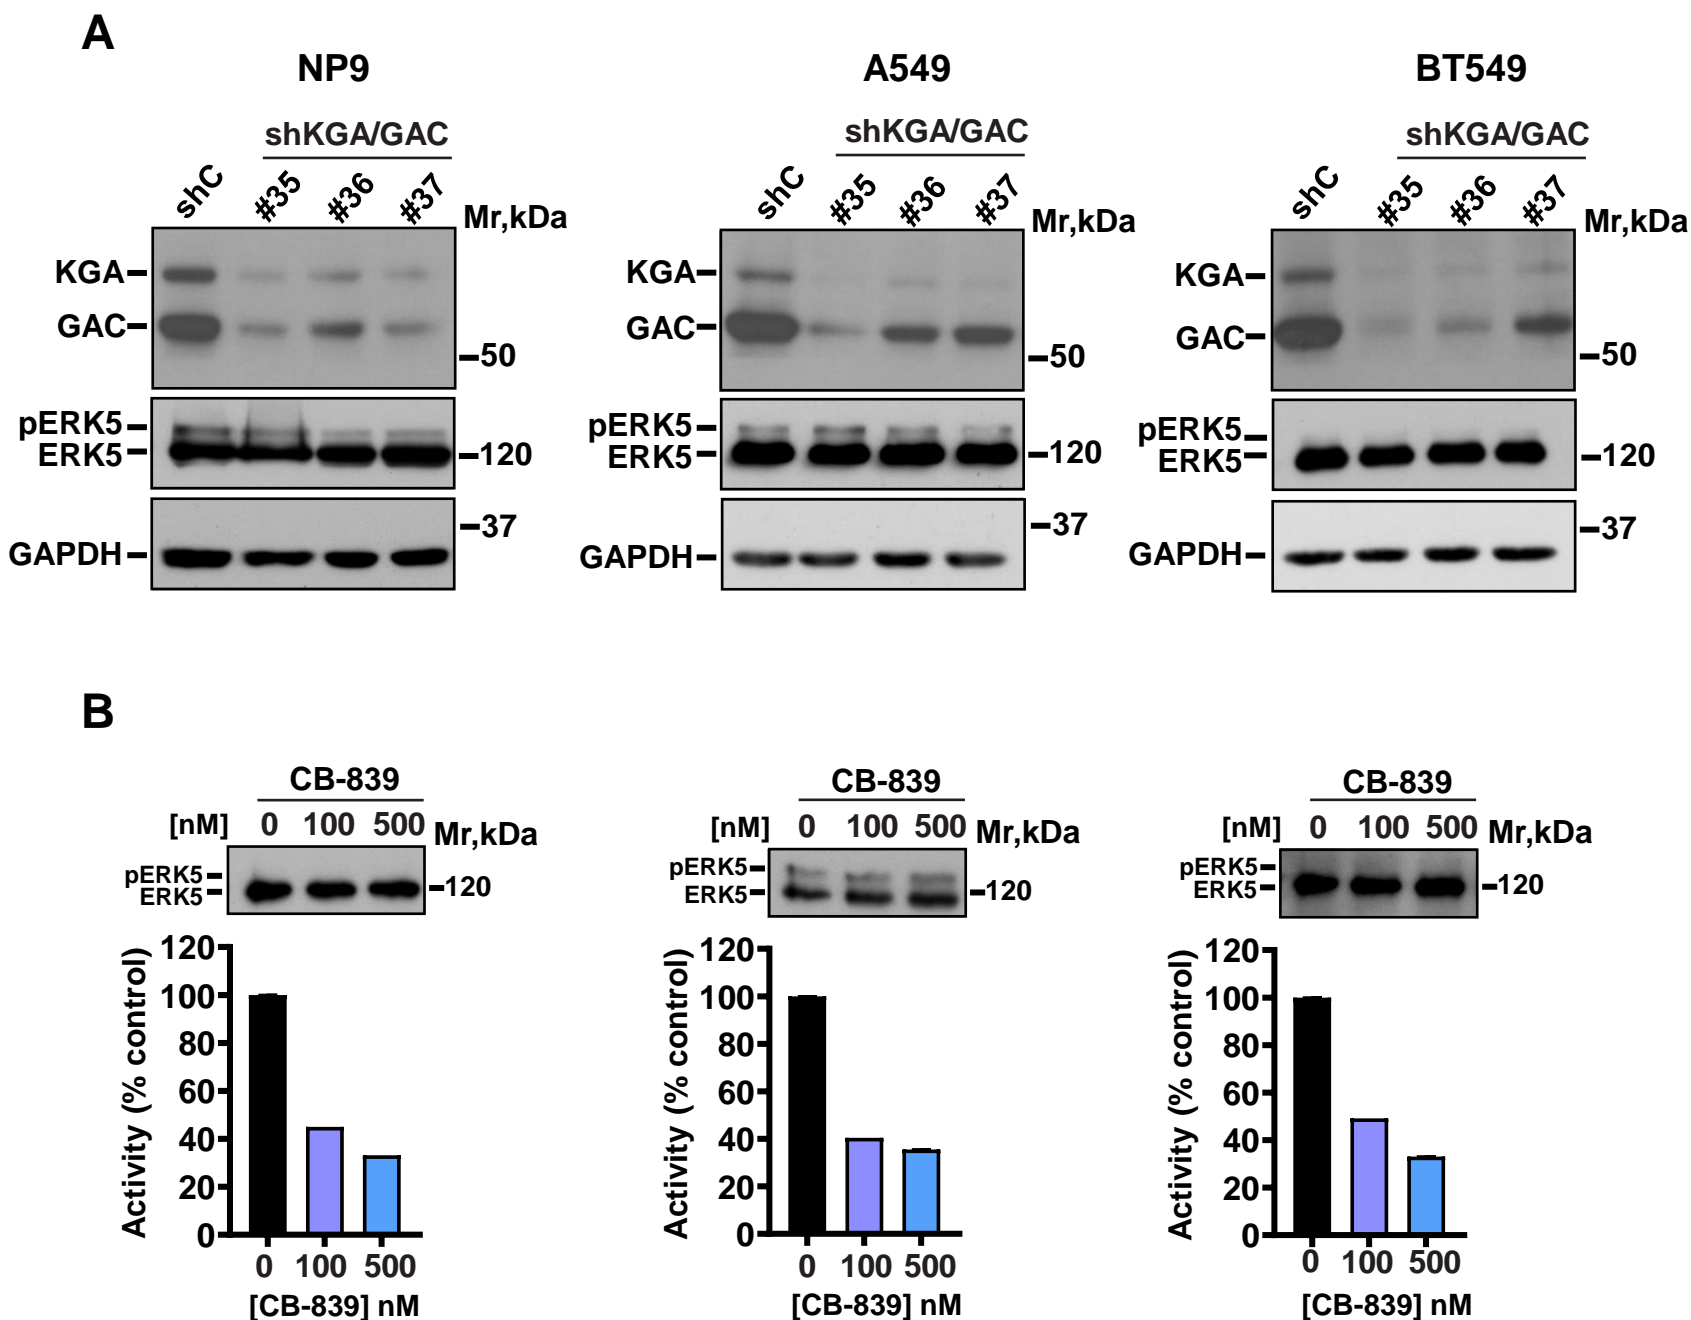

**Supplementary Figure S5. Downregulation of KGA/GAC does not affect ERK5.** (A) KGA/GAC protein expression was downregulated in NP9, A549 and BT549 cell lines with shRNA sequences targeting KGA/GAC (#35, #36 and #37) and a non-coding sequence (shC). 50  $\mu$ g of protein extracts for NP9 and 100  $\mu$ g for A549 and BT549, were resolved by SDS-PAGE followed by Western blot using the anti-KGA/GAC antibody (mouse). ERK5 expression was assessed by immunoprecipitation of 1 mg of protein with anti-ERK5 Pro1 antibody and blots were probed with anti-ERK5 C-terminus antibody. GAPDH was used as a loading control. (B) Exponentially growing cells were treated with 0.1% DMSO (vehicle) or 100 nM - 500 nM CB-839 for 24 h in culture. ERK5 expression was evaluated in the same way as for panel A. Glutaminase enzymatic activity assays were performed by the OPA method in NP9 cells (left panel), A549 cells (middle panel) and BT549 cells (right panel). Enzyme activity analysis is expressed as percentage respect to control. Bar graphs show mean  $\pm$  SD of three replicates of an experiment that was repeated twice.

|              |     | Peptide Mass Tolerance (ppm) |     |     |     |     |    |
|--------------|-----|------------------------------|-----|-----|-----|-----|----|
|              |     | 100                          | 50  | 40  | 30  | 20  | 10 |
| SCORE        | GAC | 168                          | 174 | 175 | 176 | 114 | 82 |
|              | KGA | 141                          | 147 | 147 | 148 | 92  | 63 |
| COVERAGE (%) | GAC | 26                           | 26  | 26  | 26  | 21  | 18 |
|              | KGA | 21                           | 21  | 21  | 21  | 16  | 13 |

**Supplementary Table S1.** Mascot search results for protein identification (from the red asterisk band in Figure 1B) by peptide mass fingerprint against Swiss Prot database. The error window for experimental peptide mass values (peptide mass tolerance threshold) was progressively lowered from 100 ppm to 10 ppm. Individual scores higher than 59 were considered significant (p<0.05). Percent (%) protein sequence coverage is also indicated.

|                 |     | Peptide Mass Tolerance (ppm) |     |     |     |    |    |
|-----------------|-----|------------------------------|-----|-----|-----|----|----|
|                 |     | 100                          | 50  | 40  | 30  | 20 | 10 |
| SCORE           | GAC | 225                          | 237 | 190 | 115 | 76 | 41 |
|                 | KGA | 168                          | 178 | 136 | 84  | 60 | 29 |
| COVERAGE<br>(%) | GAC | 39                           | 39  | 34  | 26  | 21 | 13 |
|                 | KGA | 29                           | 29  | 25  | 21  | 16 | 9  |

**Supplementary Table S2.** Mascot search results for protein identification (from the red asterisk band in Figure S2A) were obtained by comparing the peptide mass fingerprint against the Swiss Prot database. The error window for experimental peptide mass values (peptide mass tolerance threshold) was progressively lowered from 100 ppm to 10 ppm. Scores higher than 59 were considered significant ( $p < 0.05$ ). Percent (%) protein sequence coverage is also indicated. NOTE: Although the score values obtained using 10 ppm peptide mass tolerance fall below statistical significance, it is important to report that the only hits detected with the highest score were the two GLS isoforms.
